# Supplementary material for: Metabolic Plasticity Aids Amphotropism of Coxiella burnetii
Source: PubMed Central journal article supplement (PMC8594591; doi:10.1128/iai.00135-21), 2021-11-16
Supplement: iai.00135-21-s0001.pdf [file iai.00135-21-s0001.pdf]

## **Metabolic Plasticity Aids Amphotropism of *Coxiella burnetii***

### **SUPPLEMENTAL MATERIAL**

Savannah E. Sanchez<sup>a,b</sup> , Alan G. Goodman<sup>a,b</sup>, and Anders Omsland<sup>a#</sup>

<sup>a</sup>Paul G. Allen School for Global Health, and <sup>b</sup>School of Molecular Biosciences, College of Veterinary Medicine, Washington State University, Pullman, WA 99164.

#Address correspondence to Anders Omsland: anders.omsland@wsu.edu

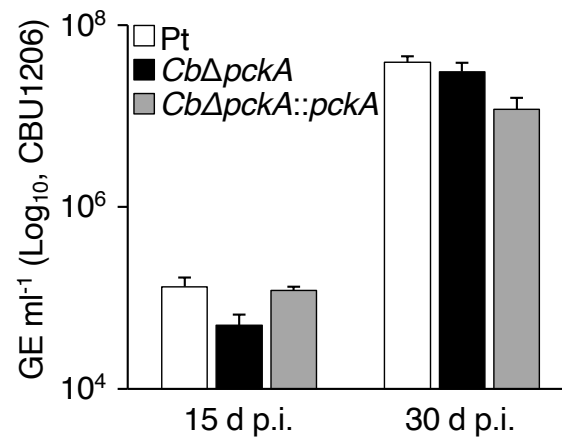

**Figure S1.** *C. burnetii* loads in *D. melanogaster* during infection. Infected flies were used for GE analysis of the Pt strain, *CbΔpckA*, and *CbΔpckA::pckA* at 15 and 30 d p.i.. Depicted data illustrate the mean  $\pm$  SEM (n = 3).

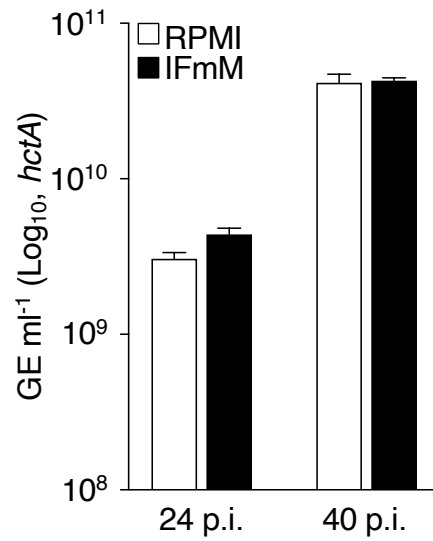

**Figure S2.** Replication of *Chlamydia trachomatis* in HeLa cells maintained in IFmM. *C. trachomatis* L2 intracellular replication was measured during infection of HeLa cells cultured in complete IFmM and compared to that observed in HeLa cells cultured in RPMI. Replication was determined via quantification of GE at 24 and 40 h p.i.. Depicted data illustrate the mean  $\pm$  SEM (n = 3). The gene target for qPCR was *C. trachomatis hctA*.

**Table S1.** Comparison of IFmM and commercially available tissue culture media.

|                                         |               | IFmM                  |         | RPMI<br>1640 | DMEM    | MEM     |
|-----------------------------------------|---------------|-----------------------|---------|--------------|---------|---------|
| Inorganic salts                         | FW<br>(g/mol) | Concentration<br>(mM) | mg/L    | mg/L         | mg/L    | mg/L    |
| Calcium chloride                        | 110.98        | 1.35                  | 150.00  | -            | 200.00  | 200.00  |
| Calcium nitrate                         | 164.09        | -                     | -       | 100.00       | -       | -       |
| Ferric nitrate<br>nonahydrate           | 403.99        | -                     | -       | -            | 0.10    | -       |
| Magnesium sulfate<br>anhydrous          | 120.00        | 0.83                  | 100.00  | 48.84        | 97.67   | 97.67   |
| Potassium chloride                      | 75.00         | 5.33                  | 400.00  | 400.00       | 400.00  | 400.00  |
| Sodium chloride                         | 58.44         | 102.67                | 6000.00 | 6000.00      | 6400.00 | 6800.00 |
| Sodium phosphate<br>monobasic anhydrous | 119.98        | -                     | -       | -            | 109.00  | 140.00  |
| Sodium phosphate<br>dibasic anhydrous   | 142.00        | 5.63                  | 800.00  | 800.00       | -       | -       |
| Sodium bicarbonate                      | 84.00         | 23.81                 | 2000.00 | 2000.00      | 3700.00 | 2200.00 |
| Vitamins                                | FW<br>(g/mol) | Concentration<br>(mM) | mg/L    | mg/L         | mg/L    | mg/L    |
| D-Biotin                                | 244.00        | 8.20E-04              | 0.20    | 0.20         | -       | -       |
| Choline chloride                        | 140.00        | 2.14E-02              | 3.00    | 3.00         | 4.00    | 1.00    |
| D-Calcium<br>pantothenate               | 477.00        | 5.24E-04              | 0.25    | 0.25         | 4.00    | 1.00    |
| Folic acid                              | 441.00        | 2.27E-03              | 1.00    | 1.00         | 4.00    | 1.00    |
| myo-Inositol                            | 180.16        | 1.94E-01              | 35.00   | 35.00        | 7.20    | 2.00    |
| Niacinamide                             | 122.00        | 8.20E-03              | 1.00    | 1.00         | 4.00    | 1.00    |
| p-Amino benzoic acid                    | 137.00        | 7.30E-03              | 1.00    | 1.00         | -       | -       |
| Pyridoxal<br>hydrochloride              | 203.62        | -                     | -       | -            | 4.00    | 1.00    |
| Pyridoxine<br>hydrochloride             | 206.00        | 4.85E-03              | 1.00    | 1.00         | -       | -       |
| Riboflavin                              | 376.00        | 5.32E-04              | 0.20    | 0.20         | 0.40    | 0.10    |
| Thiamine<br>hydrochloride               | 337.00        | 2.97E-03              | 1.00    | 1.00         | 4.00    | 1.00    |
| Vitamin B12                             | 1355.00       | 3.69E-06              | 0.005   | 0.005        | -       | -       |
| Amino acids                             | FW<br>(g/mol) | Concentration<br>(mM) | mg/L    | mg/L         | mg/L    | mg/L    |
| Glycine                                 | 75.07         | 0.248                 | 18.59   | 10.00        | 30.00   | -       |
| L-alanine                               | 89.10         | 0.386                 | 34.41   | -            | -       | -       |
| L-arginine                              | 210.60        | 0.088                 | 18.57   | 200.00       | 84.00   | 126.00  |
| L-asparagine                            | 132.12        | 0.062                 | 8.13    | 50.00        | -       | -       |
| L-aspartic acid                         | 133.11        | 0.043                 | 5.72    | 20.00        | -       | -       |
| L-cysteine                              | 157.62        | 0.034                 | 5.36    | -            | -       | -       |
| L-cystine                               | 240.00        | -                     | -       | 65.20        | 62.60   | 31.00   |
| L-glutamic acid                         | 147.13        | 0.071                 | 10.46   | 20.00        | -       | -       |

|                    |               |                       |        |         |         |         |
|--------------------|---------------|-----------------------|--------|---------|---------|---------|
| L-glutamine        | 146.15        | 0.773                 | 112.99 | 300.00  | 584.00  | 292.00  |
| L-histidine        | 209.63        | 0.117                 | 24.57  | 15.00   | 42.00   | 42.00   |
| L-hydroxyproline   | 131.00        | -                     | -      | 20.00   | -       | -       |
| L-isoleucine       | 131.18        | 0.069                 | 9.05   | 50.00   | 105.00  | 52.00   |
| L-leucine          | 131.18        | 0.163                 | 21.42  | 50.00   | 105.00  | 52.00   |
| L-lysine           | 182.65        | 0.175                 | 31.91  | 40.00   | 146.00  | 73.00   |
| L-methionine       | 149.21        | 0.033                 | 4.95   | 15.00   | 30.00   | 15.00   |
| L-phenylalanine    | 165.19        | 0.064                 | 10.54  | 15.00   | 66.00   | 32.00   |
| L-proline          | 115.13        | 0.050                 | 5.75   | 20.00   | -       | -       |
| L-serine           | 105.09        | 0.115                 | 12.11  | 30.00   | 42.00   | -       |
| L-threonine        | 119.12        | 0.132                 | 15.72  | 20.00   | 95.00   | 48.00   |
| L-tryptophan       | 204.23        | 0.015                 | 2.96   | 5.00    | 16.00   | 10.00   |
| L-tyrosine         | 181.19        | 0.066                 | 11.99  | 28.83   | 103.79  | 52.00   |
| L-valine           | 117.15        | 0.249                 | 29.19  | 20.00   | 94.00   | 46.00   |
| Additional factors | FW<br>(g/mol) | Concentration<br>(mM) | mg/L   | mg/L    | mg/L    | mg/L    |
| Glucose            | 180.16        | 2.50                  | 450    | 2000.00 | 1000.00 | 1000.00 |
| Glutathione        | 307.32        | -                     | -      | 1.00    | -       | -       |
| Sodium pyruvate    | 110.00        | -                     | -      | -       | 110.00  | -       |

**Table S2.** Comparison of concentrations of amino acids and ions in mammalian interstitial fluid to the chemical composition of IFmM.

| Amino acids   | Final concentration ( $\mu\text{M}$ )                        |       | Ions                                           | Final concentration (mM)                |                   |
|---------------|--------------------------------------------------------------|-------|------------------------------------------------|-----------------------------------------|-------------------|
|               | Reported                                                     | IFmM  |                                                | Reported                                | IFmM <sup>g</sup> |
| Alanine       | 248.0 <sup>a</sup> , 333.0 <sup>b</sup> , 386.2 <sup>c</sup> | 386.2 | Na <sup>+</sup>                                | 155.1 <sup>d</sup> , 134.6 <sup>e</sup> | 137.75            |
| Arginine      | 88.2 <sup>c</sup>                                            | 88.2  | K <sup>+</sup>                                 | 5.2 <sup>d</sup> , 3.17 <sup>e</sup>    | 5.33              |
| Asparagine    | 52.0 <sup>a</sup> , 56.0 <sup>b</sup> , 61.5 <sup>c</sup>    | 61.5  | Ca <sup>+</sup>                                | 1.47 <sup>d</sup> , 1.55 <sup>e</sup>   | 1.35              |
| Aspartic acid | 62.0 <sup>a</sup> , 43.0 <sup>b</sup>                        | 43.0  | Mg <sup>+2</sup>                               | 0.51 <sup>e</sup>                       | 0.83              |
| Cysteine      | 34.0 <sup>a</sup> , 34.0 <sup>b</sup>                        | 34.0  | Cl <sup>-</sup>                                | 107.1 <sup>d</sup>                      | 110.70            |
| Glutamic acid | 43.0 <sup>a</sup> , 66.0 <sup>b</sup> , 71.1 <sup>c</sup>    | 71.1  | PO <sub>4</sub> <sup>-3</sup>                  | 0.61 <sup>e</sup>                       | 5.63              |
| Glutamine     | 529.0 <sup>a</sup> , 672.0 <sup>b</sup> , 773.1 <sup>c</sup> | 773.1 | CO <sub>2</sub> /HCO <sub>3</sub> <sup>-</sup> | 23.9 <sup>e</sup>                       | 23.81             |
| Glycine       | 565.0 <sup>a</sup> , 400.0 <sup>b</sup> , 247.6 <sup>c</sup> | 247.6 |                                                |                                         |                   |
| Histidine     | 117.2 <sup>c</sup>                                           | 117.2 |                                                |                                         |                   |
| Isoleucine    | 65.0 <sup>a</sup> , 70.0 <sup>b</sup> , 69.0 <sup>c</sup>    | 69.0  |                                                |                                         |                   |
| Leucine       | 149.0 <sup>a</sup> , 165.0 <sup>b</sup> , 163.3 <sup>c</sup> | 163.3 |                                                |                                         |                   |
| Lysine        | 174.7 <sup>c</sup>                                           | 174.7 |                                                |                                         |                   |
| Methionine    | 18.0 <sup>a</sup> , 14.0 <sup>b</sup> , 33.2 <sup>c</sup>    | 33.2  |                                                |                                         |                   |
| Phenylalanine | 58.0 <sup>a</sup> , 72.0 <sup>b</sup> , 63.8 <sup>c</sup>    | 63.9  |                                                |                                         |                   |
| Proline       | ---                                                          | 50.0  |                                                |                                         |                   |
| Serine        | 195.0 <sup>a</sup> , 125.0 <sup>b</sup> , 115.2 <sup>c</sup> | 115.2 |                                                |                                         |                   |
| Threonine     | 163.0 <sup>a</sup> , 185.0 <sup>b</sup> , 132.0 <sup>c</sup> | 132.0 |                                                |                                         |                   |
| Tryptophan    | 14.5 <sup>c</sup>                                            | 14.5  |                                                |                                         |                   |
| Tyrosine      | 54.0 <sup>a</sup> , 62.0 <sup>b</sup> , 66.2 <sup>c</sup>    | 66.2  |                                                |                                         |                   |
| Valine        | 222.0 <sup>a</sup> , 257.0 <sup>b</sup> , 249.2 <sup>c</sup> | 249.2 |                                                |                                         |                   |

<sup>a</sup>Table 2, interstitial concentrations from adipose tissue (1).

<sup>b</sup>Table 2, interstitial concentrations from muscle tissue (1).

<sup>c</sup>Table 1, Period 3 (151-225 min) dialysate concentrations (2).

<sup>d</sup>Table 4, tissue fluid free concentrations (3).

<sup>e</sup>Table 2, interstitial fluid concentrations (4).

<sup>g</sup>Final ion composition of IFmM does not include ions contributed by amino acid salts.

## REFERENCES

1. Maggs DG, Jacob R, Rife F, Lange R, Leone P, During MJ, Tamborlane WV, Sherwin RS. 1995. Interstitial fluid concentrations of glycerol, glucose, and amino acids in human quadriceps muscle and adipose tissue. Evidence for significant lipolysis in skeletal muscle. *J Clin Invest* 96:370–377.
2. Gutierrez A, Anderstam B, Alvestrand A. 1999. Amino acid concentration in the interstitium of human skeletal muscle: a microdialysis study. *Eur J Clin Invest* 29:947–952.
3. Gilanyi M, Ikrenyi C, Fekete J, Ikrenyi K, Kovach AG. 1988. Ion concentrations in subcutaneous interstitial fluid: measured versus expected values. *Am J Physiol* 255:F513-519.
4. Fogh-Andersen N, Altura BM, Altura BT, Siggaard-Andersen O. 1995. Composition of interstitial fluid. *Clin Chem* 41:1522–1525.
